# Supplementary material for: Neuroprotective and Disease-Modifying Effects of the Triazinetrione ACD856, a Positive Allosteric Modulator of Trk-Receptors for the Treatment of Cognitive Dysfunction in Alzheimer’s Disease
Source: MDPI journal article supplement (doi:10.3390/ijms241311159), 2023-07-06
Supplement: s1 [file s1]

Supplemental figure S1.

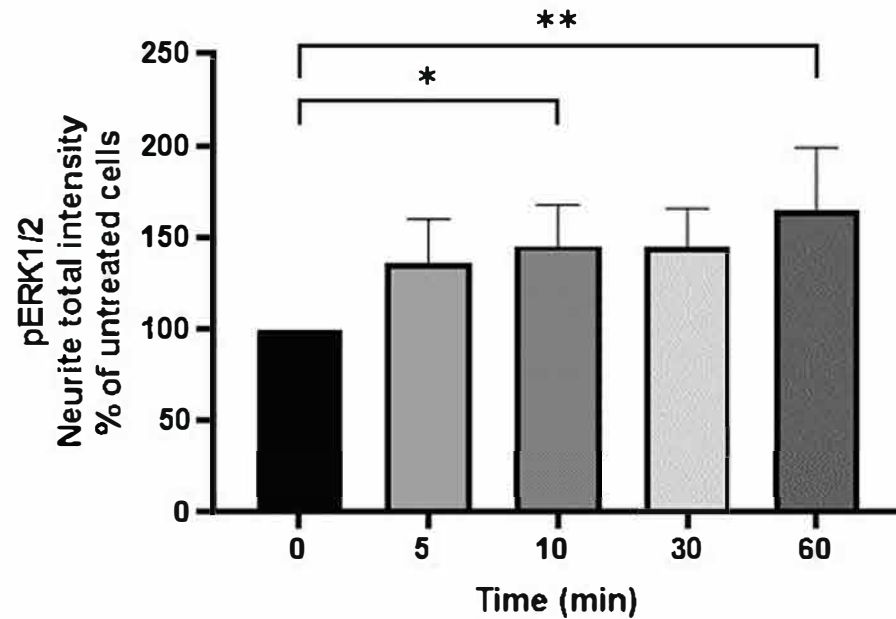

(a)

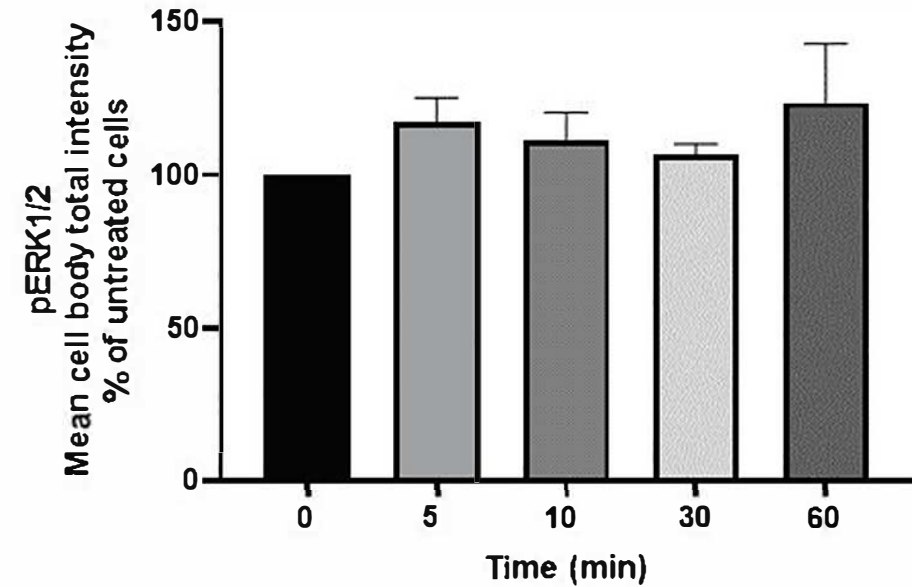

(b)

Figure S1. The levels of phosphorylated ERK1/2 were determined by immunocytochemistry and neurite total intensity of pERK1/2-positive neurites (a) or the total intensity of pERK1/2 in cell bodies were determined (b). \* $p < 0.05$ , \*\* $p < 0.01$  compared to control group at one-way ANOVA with Dunnett's multiple comparisons test. Data shown are the mean value of all replicates  $\pm$  SEM from three different experiments.
